**Title:** Voluntary control of visual appearance

**Authors and affiliations:** William J Harrison <sup>1,2</sup>. & Reuben Rideaux <sup>1</sup>

<sup>1</sup> Department of Psychology, University of Cambridge  
Downing Street, Cambridge CB2 3EB, UK

<sup>2</sup> Queensland Brain Institute, The University of Queensland  
QBI Building #79, St Lucia QLD 4072, Australia

**Corresponding author:** William Harrison ([willjharri@gmail.com](mailto:willjharri@gmail.com))

**Classification:** Biological Sciences; Psychological and Cognitive Sciences

## 1 **ABSTRACT**

2 The extent to which visual appearance is shaped by attentional goals is controversial.  
3 Voluntary attention may simply modulate the priority with which information is accessed by  
4 higher cognitive functions involved in perceptual decision making. Alternatively, voluntary  
5 attention may influence fundamental visual processes, such as those involved in  
6 segmenting an incoming retinal signal into a structured scene of coherent objects, thereby  
7 determining visual appearance. Here we tested whether the segmentation and integration  
8 of visual form can be determined by an observer's goals by exploiting a novel variant of the  
9 classical Kanizsa figure. We generated predictions about the influence of attention with a  
10 machine classifier, and tested these predictions with a psychophysical response  
11 classification technique. Despite seeing the same image on each trial, observers' perception  
12 of illusory spatial structure depended on their attentional goals. These attention-contingent  
13 illusory contours directly conflicted with equally plausible visual form implied by the geometry  
14 of the stimulus, revealing that attentional selection can determine the perceived layout of a  
15 fragmented scene. Attentional goals, therefore, not only select pre-computed features or  
16 regions of space for prioritised processing, but, under certain conditions, also greatly  
17 influence perceptual organisation and thus visual appearance.

18

## 19 **SIGNIFICANCE STATEMENT**

20 The extent to which higher cognitive functions can influence perceptual experience is hotly  
21 debated. The role of voluntary spatial attention, the ability to focus on only some parts of a  
22 scene, has been particularly controversial among neuroscientists and psychologists who  
23 aim to uncover the basic neural computations involved in grouping image features into  
24 coherent objects. To address this issue, we repeatedly presented the same novel  
25 ambiguous image to observers and changed their attentional goals by having them make  
26 fine spatial judgements about only some elements of the image. We found that observers'  
27 attentional goals determine the perceived organisation of multiple illusory shapes. We thus  
28 reveal that voluntary spatial attention can control the fundamental processes that  
29 determine visual experience.

## 30 INTRODUCTION

31 The clutter inherent to natural visual environments means that goal-relevant objects often  
32 partially occlude one another. A critical function of the human visual system is to group  
33 common parts of objects while segmenting them from distracting objects and background,  
34 a process which requires interpreting an object's borders. Figures which produce illusory  
35 contours, such as the classic Kanizsa triangle (1), have provided many insights into this  
36 problem by revealing the inferential processes made in determining figure-ground  
37 relationships. These figures give rise to a vivid percept of a shape emerging from sparse  
38 information, and thus demonstrate the visual system's ability to interpolate structure from  
39 fragmented information, to perceive edges in the absence of luminance discontinuities, and  
40 to fill-in a shape's surface properties. In the present study, we exploit these figures to  
41 investigate whether voluntary attention influences visual appearance.

42  
43 Most objects can be differentiated from their backgrounds via a luminance-defined border.  
44 The visual system is tasked with allocating one side of the border to an occluding object,  
45 and the other side to the background. This computation can be performed by neurons in  
46 macaque visual area V2 whose receptive fields fall on the edge of an object (2). These  
47 "border-ownership" cells can distinguish figure from ground even when the monkey attends  
48 elsewhere in the display (3), and psychophysical adaptation aftereffects suggest such cells  
49 also exist in humans (4). Further, neurophysiological work has revealed that V2 cells also  
50 process illusory edges (5), though it is unclear whether those cells possess the same  
51 properties as border-ownership cells. These findings have contributed to the claim that  
52 visual structure is computed automatically and relatively early in the visual system, and that  
53 visual attention is guided by this pre-computed structure (6).

54  
55 It is also known, however, that visual attention can modulate the perception of figure-ground  
56 relationships of luminance-defined stimuli. As early as 1832, Necker described his ability to  
57 alter the apparent depth of an engraved crystalline form, now referred to as a Necker cube,  
58 via an overt shift of attention (7). More recent psychophysical work has shown that voluntary  
59 attention can alter perceived depth order (8) as in the case of Rubin's face-vase illusion  
60 (9)(10), and can also alter apparent surface transparency (11). Furthermore, visual attention  
61 has been shown to facilitate visual grouping according to Gestalt rules at both the  
62 neurophysiological (12) and behavioural (13) level. These findings raise the possibility that,

63 regardless of whether it is necessary, visual attention may play a determining role in visual  
64 appearance under certain conditions. However, because these previous studies involved  
65 physically defined stimuli, it remains unclear whether visual attention simply modulates pre-  
66 attentively computed structure as suggested by neurophysiological work (3, 14), or whether  
67 structural computations depend on the state of attention. Rivalrous illusory figures are  
68 perfectly suited to address this issue: if attending to one illusory figure results in illusory  
69 contours that directly conflict with the form of another illusory figure, then structural  
70 computations must depend on attention.

71

72 To investigate the influence of voluntary attention on visual appearance, here we combined  
73 a novel illusory figure with an attentionally demanding task, exploiting human observers'  
74 propensity to use illusory edges when making perceptual decisions (15). We developed a  
75 novel Kanizsa figure (**Fig. 1a**), in which "pacman" discs are arranged at the tips of an  
76 imaginary star. This figure includes multiple Gestalt cues that promote the segmentation and  
77 integration of various forms not defined by the physics of the stimulus. We predict that,  
78 because some of these cues suggest competing configurations, selective attention can bias  
79 which figure elements are assigned to figure and which to ground. Although such a  
80 hypothesis is relatively uncontroversial, the critical question is whether grouping via  
81 selective attention promotes illusory contour formation in direct conflict with competing  
82 implied form. For example, while the black inducers of **Figure 1a** form part of an implied  
83 star, in isolation the black inducers imply an illusory triangle that competes with both the star  
84 form as well as a second illusory triangle implied by the white inducers. The dependence of  
85 such perceptual organisation on voluntary attentional selection thus can reveal the extent of  
86 top-down processing on visual appearance. We therefore assessed whether the apparent  
87 organisation of the figure is determined by which inducers are attended.

88

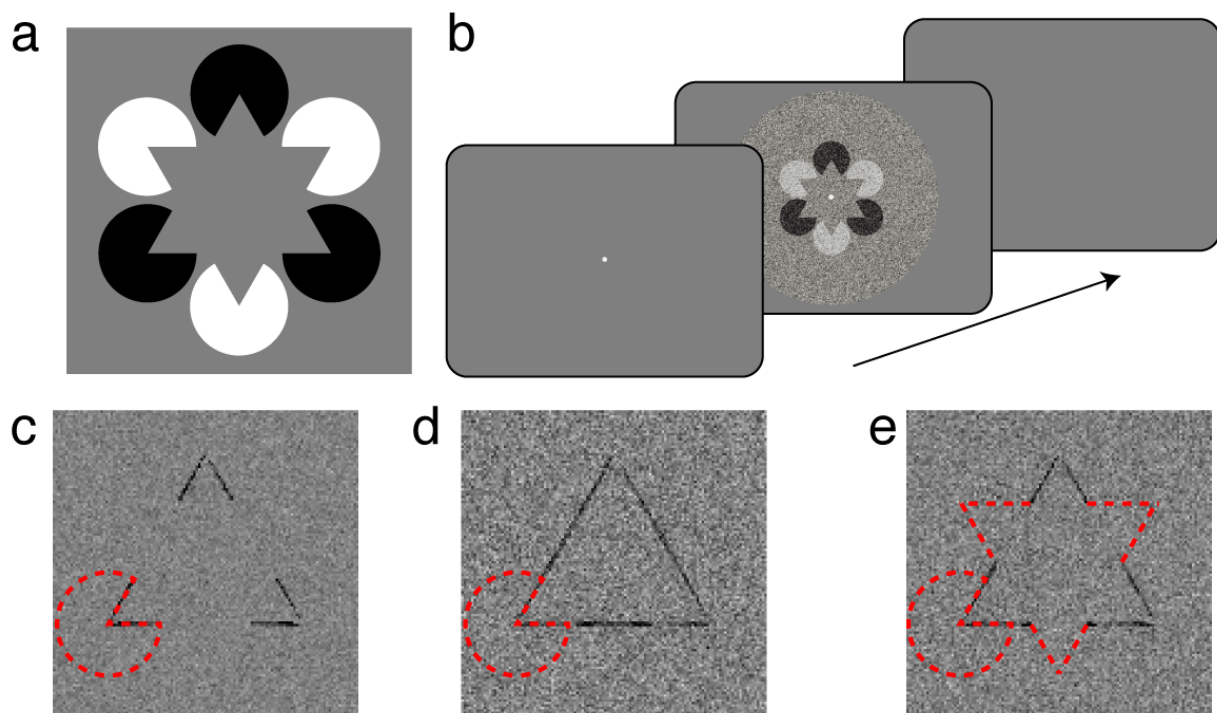

89

90 **Figure 1.** Novel illusory figure and design used to test the influence of attention on perceptual organisation. a)  
91 Our variant of the classic Kanizsa figure. “Pacman” inducers are arranged such that a star appears to occlude  
92 black and white discs. Whereas the ensemble of features may produce the appearance of a star, grouping  
93 features by polarity leads to competing illusory triangles. We test whether attending to one set of inducers (e.g.  
94 the white inducers) leads to interpolation of the illusory edge. b) Example trial sequence. After an observer  
95 fixates a spot, the illusory figure with overlaid Gaussian noise is displayed for 250ms. The observer’s task  
96 was to report whether the tips of the upright or inverted triangle were narrower or wider than an equilateral triangle.  
97 The target triangle was cued prior to, and held constant throughout, each testing block. The observer’s  
98 perceptual reports were then correlated with the noise on each trial to produce classification images. (c - e)  
99 Support vector machine (SVM) classifier images. We had a SVM classifier perform “narrow” vs “wide” triangle  
100 judgements after training it on three different protocols: (c) inducers, a (d) triangle, or a (e) star (see Methods).  
101 Dashed red lines show the location of a pacman for reference, and in (e) the tips of the star that do not influence  
102 classification.

103

## 104 RESULTS

105 We used a response classification technique that allowed us to simultaneously assess  
106 where observers’ attention was allocated, and whether such attentional allocation resulted  
107 in visual interpolation of illusory edges. At the beginning of each block of testing, observers  
108 were cued to report the relative jaw size of the inducers forming an upright (or inverted)  
109 triangle, corresponding to the white (or black) elements in **Figure 1a**. By adding random  
110 visual noise to the target image on each trial (**Fig. 1b**), we could use reverse correlation to  
111 measure “classification images”. An observer’s classification image quantifies a correlation

112 between each pixel in the image and the perceptual report revealing which spatial structures  
113 are used for perceptual decisions (15).

114

115 We generated hypotheses regarding how observers' voluntary attention may influence their  
116 perception of this figure. We used a support vector machine (SVM) classifier to judge small  
117 changes to a triangle image after training it on one of three different protocols. First, we  
118 generated a prediction of the hypothesis that observers can attend to the correct inducers,  
119 but do not perceive illusory edges, by training a model to discriminate only the jaws of the  
120 inducers. This model is analogous to that of an ideal observer and reveals that only structure  
121 at the edges of the stimuli are used in generating a response (**Fig. 1c**). We next generated  
122 predictions of how illusory edges could be interpolated in this task. In one case, we assumed  
123 illusory contours would be formed between attended inducers. We thus trained the classifier  
124 to discriminate whether a triangle's edges were bent outward or inward, and found a  
125 classification image approximating a triangle (**Fig. 1d**). In the other case, we assumed that,  
126 although selective attention may guide the correct perceptual decision, the illusory form of  
127 a star may be determined pre-attentively according to the physical structure of the entire  
128 stimulus. In this case, we trained the classifier to discriminate whether alternating tips of a  
129 star were relatively wide or narrow. The resulting classification image reveals edges that  
130 are interpolated beyond the inducers, but that they do not extend beyond the alternating star  
131 tips (**Fig. 1e**). These predictions not only provide qualitative comparisons for our empirical  
132 data, but they also allow us to formally test which training regime produces a classification  
133 image that most closely resembles human data.

134

135 To motivate observers to attend to only one possible configuration of the illusory figure, they  
136 were cued to report the relative jaw size ("narrow" or "wide") of only a subset of pacmen  
137 positioned at the tips of an imaginary star (**Fig. 1a**). Specifically, observers were instructed  
138 to report only the jaw size of inducers forming an upward (or downward) triangle within a  
139 testing block. The non-cued inducer jaws varied independently of the cued inducers and  
140 thus added no information regarding the correct response. To derive the spatial structure  
141 used for perceptual decisions, we added Gaussian noise to each trial and classified each  
142 noise image according to the observers' responses (**Fig. 1b**). To create the classification  
143 image for each observer, we summed all noise images for narrow reports and subtracted  
144 the sum of all noise images for wide reports (see Methods). We collapsed across inducer

145 polarity by inverting the noise on trials in which the white inducers were cued, and across  
146 cue direction by flipping the noise on trials in which the downward facing illusory triangle  
147 was cued. The resulting images quantify the correlation between each stimulus pixel and  
148 the observer's report. In order to analyse a single axis of emergent spatial structure, we first  
149 averaged each observer's data with itself after rotating 120° and 240° such that correlations  
150 were averaged over the three sides of the triangle. Although this step involved bilinear  
151 interpolation of neighbouring pixels, no other averaging or smoothing was performed, and  
152 this averaging is therefore most likely to only reduce the strength of emergent illusory  
153 structure.

154

155 Classification images for three observers and their mean are shown in **Figure 2a** (see **Supp.**  
156 **Fig. 1a** for unrotated classification images). Images are normalised to the “attend upright”  
157 condition. There are two obvious patterns that emerge. First, it is clear that observers based  
158 their reports on pixels within the jaws of the cued inducers, indicating that only some regions  
159 of the image – those aligned with the attended inducers – influenced perceptual decisions.  
160 Note the difference in the sign of the correlation between the edges and tips of the triangle  
161 – noise pixels in these regions have the opposite influence on narrow/wide decisions, which  
162 is likely due to an illusory widening of the jaw centre which is not registered by the SVM (cf.  
163 **Fig. 1d**). Second, the edges clearly extend beyond the red inducer outline shown in the  
164 mean image, revealing observers' reports were influenced by illusory contours. However, it  
165 is also apparent that the spatial structure is non-uniform, with weaker correlations in the  
166 centre of the illusory edges than in the corners of the inducers. We therefore quantitatively  
167 test the extent of illusory contour formation below.

168

169 To test whether the illusory edge interpolation extended into the region of the implied  
170 competing figure, we performed two analyses. First, we used Bayesian and Students' one-  
171 sampled t-tests to assess the pixel values along the edge of the triangle implied by the  
172 attended inducers (see red line in **Fig. 2a**). We selected only pixels that fell within the bounds  
173 of the competing implied triangle (see Methods and grey shaded regions of **Fig. 2b**), and  
174 found that these 18 pixels were below zero for the naïve participant (mean and sem:  $-3 \pm .9$   
175  $\times 10^{-3}$ ,  $BF_{10}=18.365$ ,  $t(17)=3.585$ ,  $p=0.002$ ,  $d = 0.845$ ), observer A2 (mean and sem:  $-5 \pm .7$   
176  $\times 10^{-3}$ ,  $BF_{10}=8,141.356$ ,  $t(17)=6.944$ ,  $p<0.001$ ,  $d = 1.637$ ), and the group (mean and sem: -



177  $3 \pm .4 \times 10^{-3}$ ,  $BF_{10}=16,580$ ,  $t(17) = 7.38$ ,  $p<0.001$ ,  $d = 1.738$ ), but not for A1 (mean and sem:  
178  $-1 \pm 1 \times 10^{-3}$ ,  $BF_{10}=0.431$ ,  $t(17)=1.15$ ,  $p=0.266$ ,  $d = 0.204$ ).

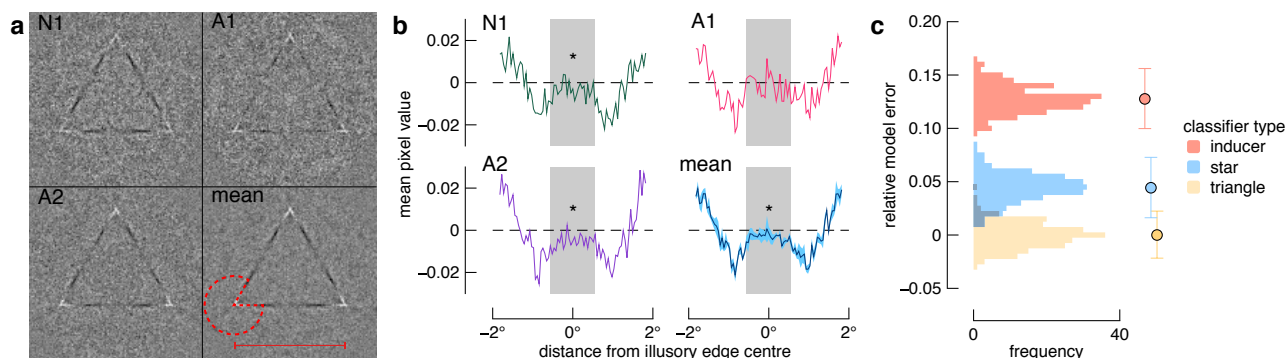

179  
180 **Figure 2.** Classification image results. a) The individual and average classification images. Black and white  
181 pixels in this image are correlated with “narrow” and “wide” perceptual reports, respectively, after 9984 trials  
182 per participant. Data have not been smoothed, but were first averaged across triangle edges and cropped to  
183 be 122x122 pixels. In the mean image, a pacman outline is shown for reference, and a red line indicates the  
184 spatial range of the implied triangle edge (from which data in (b) are shown). b) Pixel values along the illusory  
185 edge. The grey shaded region corresponds to a conservative estimate of the extent of a gap in the edge that  
186 would appear if observers necessarily saw a star shape (e.g. Fig. 1e). The blue shaded region in the mean  
187 plot shows  $\pm$ one standard error; asterisks indicate differences from zero ( $BF_{10}> 10$  and  $p < 0.05$ ; see text). N1  
188 is the naïve participant; A1 and A2 are authors. c) Comparison of SVM models. Distributions show  
189 comparisons of the mean classification image to the output of each SVM prediction, repeated 200 times. Data  
190 points and error bars represent the mean and 95% confidence intervals, respectively, for each SVM training  
191 regime. Model error has been normalised relative to the model with the least error, which is the model in which  
192 the SVM is trained to perceive a triangle within the attended inducers.

193  
194 We next quantified the spatial structure content of the classification image by testing which  
195 prediction generated by the SVM was most similar to the human data (see **Fig. 1c-e**). For  
196 each model, we generated 200 predictions, each with a unique distribution of noise, and  
197 computed the sum of squared errors between predictions and the mean classification image  
198 produced by the human observers (see Materials and Methods). The resulting distributions  
199 of error, normalised to the best model, are shown in **Figure 2c**, and reveal that the model in  
200 which we trained the classifier to perceive a complete triangle is the best fit to the data (z-  
201 test comparing the mean error for the star SVM versus the distribution of error for the triangle  
202 or inducer SVM:  $p$ 's  $< 0.0001$ ). Taken together, these analyses thus reveal illusory contour  
203 formation between attended visual elements, and this interpolation occurred despite the  
204 contour conflicting with equally plausible implied spatial structure.

205



206 We next tested the spatial specificity of illusory contour formation. For the two participants  
207 who showed a clear effect, we tested how spatially specific visual interpolation was by  
208 repeating the same analysis as above but for the row of pixels above and below the triangle  
209 boundary implied by the geometry of the attended inducers. Quite surprisingly, we found  
210 good evidence that there was an absence of illusory contour formation for the pixels below  
211 the implied triangle boundary (N1:  $BF_{01} = 3.19$ ; A2:  $BF_{01} = 3.31$ ), and equivocal evidence for  
212 the pixels above the implied triangle boundary (N1:  $BF_{10} = 1.05$ ; A2:  $BF_{01} = 1.83$ ). These  
213 results thus reveal that the strength of illusory contours was highly precisely aligned to the  
214 geometry of the triangle implied by the attended inducers. Consistent with this observation,  
215 psychophysical thresholds for identifying the relative inducer jaw size were reliably highly  
216 precise across testing sessions (see **Supp. Fig. 1b**).

217

218 Our data further address the extent to which the non-cued figural elements may have  
219 influenced perceptual judgements. In our experiment, the non-cued inducer jaw size was  
220 independent of the cued inducer jaw size, and was thus uninformative of the correct report.  
221 Indeed, we found no evidence in the classification image that observers' perceptual  
222 decisions were guided by these task-irrelevant cues. We modelled the possibility that these  
223 non-cued elements were nonetheless grouped: the SVM prediction of pre-attentive figure-  
224 ground segmentation shows gaps in the sides of the classification image triangle (**Fig 1e**).  
225 Note that this model is equivalent to observers having perceived a whole star, but with a  
226 later stage attentional signal focussed on only some regions of the pre-computed figure.  
227 Because we designed our illusory figure to be geometrically invertible, the extent of the  
228 illusory star form is pronounced if we sum the classification image with a flipped version of  
229 itself (**Fig. 3a**). In **Figure 3b**, we show the result of performing this step with the observers'  
230 average classification image. Very similar patterns of results were found for all individual  
231 images (**Supp. Fig. 2**). This result is strikingly similar to the SVM prediction, revealing that  
232 the changes in strength of edges of the illusory form are near-perfectly aligned with the  
233 geometry of the implied star or non-cued illusory triangle (**Fig. 1e**).

234

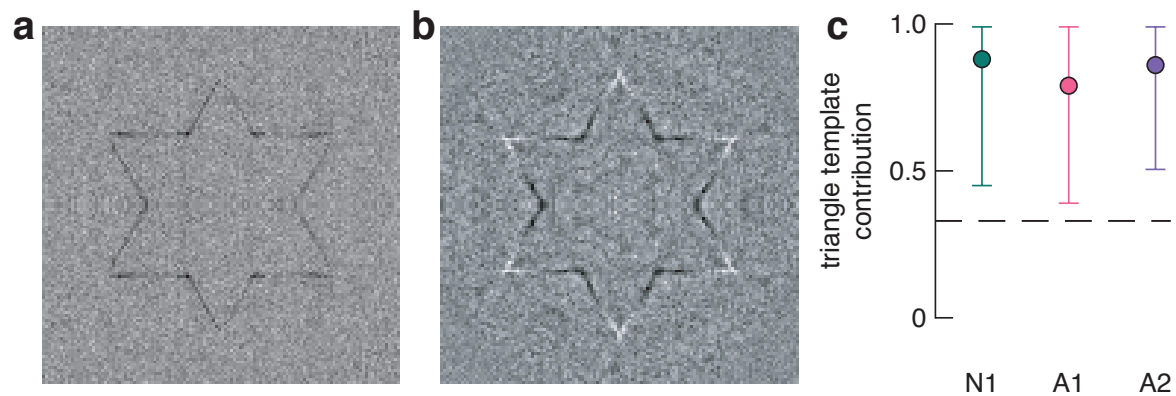

235

236

237

238

239

240

241

242

243

244

245

246

247

248

249

250

251

252

253

254

255

256

257

258

259

260

261

262

**Figure 3.** Pre-attentive grouping. a) Geometric form prediction of unattended grouping. The classification image derived from our SVM was summed with a flipped version of itself. Note that the inner corners of the star are well aligned due to the design of our original Kanizsa figure. b) Geometric form in observers' data. The mean classification image was summed with a flipped version of itself, and reveals the strength of illusory edges are well aligned to the implied star. c) Results of mixture modelling used to explore the correspondence between fluctuations of illusory edge strength and implied figure geometry. The best fitting model for each observer was one in which attention determined perceptual outcome in 84% of trials. The dashed line indicates the proportion expected from a purely stochastic process. Error bars show 95% confidence intervals.

There are at least three possible explanations for the near-perfect alignment of changes in illusory edge strength with the implied star figure (**Fig. 3b**). First, a similar classification image would have been obtained had observers perceived a star on every trial, a possibility which we discounted in the results described above. Second, this qualitative result could be generated if trial-by-trial perceptual organisation was stochastic, such that observers perceived each possible configuration approximately equally often across trials. Under this hypothesis, the resulting illusory contours shown in **Figure 2a** are incidental rather than being determined by observers' attentional goals. The third possible explanation is that observers' voluntary allocation of attention determined the outcome on most, but not all, trials. To distinguish between the two latter possibilities, we used mixture modelling to quantify the proportion of trials in which observers' percept depended on attentional instructions (see Materials and Methods). A purely stochastic process would be implied were the proportion of trials accounted for by the triangle template no different from 0.33 (i.e. the apparent top-most surface was equally often a star, the cued triangle, or the non-cued triangle, see **Fig. 1c-e**). However, in the best fitting model, the attention-contingent triangle template contributed to 84% of trials on average, which is much greater than expected by a stochastic process (**Fig. 3c**). This mixture modelling is thus consistent

263 with observers' attentional goals determining illusory contour interpolation on the vast  
264 majority of trials.

265

## 266 **DISCUSSION**

267 We used classification images to address whether voluntary attention determines a scene's  
268 apparent visual structure. Using a psychophysical response classification paradigm we  
269 tested which of three competing model predictions best describes the influence of attention  
270 on illusory contour formation. Our results clearly show that voluntary attention can guide  
271 the fundamental processes involved in perceptual organisation, thus determining visual  
272 appearance.

273

274 Unlike previous studies that show visual attention modulates the appearance of physically  
275 defined surfaces (e.g., attending to different surfaces of the Necker cube (7)), our study  
276 shows a rich interaction between attention and endogenously generated percepts. The  
277 illusory edges of the triangle implied by the attended inducers directly conflict with the  
278 regions of the competing implied figures (i.e., the star and inverted triangle). Our finding that  
279 illusory edges were interpolated between attended inducers reveals that attention can  
280 determine depth order, even when figures and ground are illusory. Spatial structure is thus  
281 computed by neural operations that are at least partially contingent on the voluntary state of  
282 the observer. The precision of illusory contours was nonetheless tightly aligned to the  
283 geometry of luminance defined structure, indicating these inferential processes are also  
284 highly contingent on scene or task context. Indeed, observers' psychophysical thresholds  
285 for the inducer task reveal a correspondence between their precise objective psychophysical  
286 performance and subjective classification image.

287

288 We were able to quantify the influence of non-cued stimuli on perception by measuring a  
289 classification image across the entire stimulus. We found that changes in the strength of  
290 illusory contour formation between attended inducers were aligned with form implied by the  
291 non-cued inducers. Our mixture modelling suggests that the non-cued stimuli influenced  
292 performance on approximately 16% of trials. Such a contribution of task-irrelevant features  
293 on perceptual decisions could be attributed to lapses in attentional allocation, or variability  
294 in the feed-forward processing of the incoming signal. Measuring perceived form in the  
295 absence of visual attention is notoriously difficult (10), which is perhaps one reason why

296 many studies of figure-ground organisation rely on single-unit recordings. Whereas  
297 neurophysiological recordings have revealed the brain regions involved in perceptual  
298 organisation, they have left open the question of perceptual phenomena. Our data show that  
299 the influence of attention on perception is constrained by task-irrelevant information,  
300 providing yet further evidence that visual experience is the combination of both bottom-up  
301 and top-down processes. This conclusion sheds light on previous work in which competing  
302 colour adaptation after-effects are biased according to alternating illusory contours at a  
303 similar location (16). In these demonstrations, the onset of inducer elements likely attracts  
304 an observer's attention, resulting in perceptual completion processes specific to only the  
305 implied shape of attended elements. Surface filling-in would then follow the contours of the  
306 implied form (17). Indeed, other recent research from our lab reveals similar interactions  
307 may occur between attention and surface filling-in (18).

308  
309 The influence of attention on figure-ground segmentation may be explained by feedback  
310 signals from the lateral occipital complex (19, 20) that could act as early as V1 (12), but also  
311 may involve modulating responses of border-ownership cells in V2 (3). Border-ownership  
312 cells indicate which side of a border is an object versus ground. Previous work showing the  
313 activity of border-ownership cells is modulated by visual attention (3) has been limited to  
314 luminance-defined borders. Our finding that information inferred by the visual system is  
315 influenced by voluntary attention suggests that attentional modulation of border-ownership  
316 may similarly apply to illusory contours (5). Early psychophysical work suggested that  
317 illusory contours are perceived in the absence of attention (21, 22), but did not address the  
318 question of whether illusory contours can be formed *because* of voluntary attention, which  
319 we have shown here. Our findings are also distinct from other recent work that found  
320 attention can influence the appearance of existing surfaces (11). In our study, visual  
321 attention had a causal role in forming the structure from which perceptual decisions were  
322 made. We anticipate that our simple stimulus and task design may prove to be a useful  
323 neurophysiological assay to test further the neural substrates governing the interaction  
324 between voluntary attention and perceptual organisation.

325

## 326 **MATERIALS AND METHODS**

327 **Observers.** Three healthy subjects, one naïve (N1) and two authors (A1 & A2 corresponding  
328 to authors RR and WH, respectively), gave their informed written consent to participate in

329 the project, which was approved by the University of Cambridge Psychology Research  
330 Ethics Committee. All procedures were in accordance with approved guidelines. Simulations  
331 were run to determine an appropriate number of trials per participant to ensure sufficient  
332 statistical power, and our total sample is similar to those generally employed for  
333 classification images. All participants had normal vision.

334

335 **Apparatus.** Stimuli were generated in MATLAB (The MathWorks, Inc., Natick, MA) using  
336 Psychophysics Toolbox extensions (23–25). Stimuli were presented on a calibrated ASUS  
337 LCD monitor (120Hz, 1920×1200). The viewing distance was 57 cm and participants' head  
338 position was stabilized using a head and chin rest (43 pixels per degree of visual angle).  
339 Eye movement was recorded at 500Hz using an EyeLink 1000 (SR Research Ltd., Ontario,  
340 Canada).

341

342 **Stimuli and task.** The stimulus was a modified version of the classic Kanisza triangle. Six  
343 pacman discs (radius =  $1^\circ$ ) were arranged at the tips of an imaginary star centred on a  
344 fixation spot. The six tips of the star were equally spaced, and the distance from the centre  
345 of the star to the centre of each pacman was  $2.1^\circ$ . The fixation spot was a white circle ( $0.1^\circ$   
346 diameter) and a black cross hair (stroke width = 1 pixel). The stimulus was presented on a  
347 grey background ( $77.5 \text{ cd/m}^2$ ). The polarity of the inducers with respect to the background  
348 alternated across star tips. For half the trials, the three inducers forming an upright triangle  
349 were white, while the others were black, and for half the trials this was reversed. Inducers  
350 had a Weber contrast of .75.

351

352 We added Gaussian noise to the stimulus on each trial to measure classification images.  
353 Noise was 250 x 250 independently drawn luminance values with a mean of 0 and standard  
354 deviation of 1. Each noise image was scaled without interpolation to occupy 500 x 500  
355 pixels, such that each randomly drawn luminance value occupied 2 x 2 pixels ( $.05^\circ \times .05^\circ$ ).  
356 The amplitude of these luminance values was then scaled to have an effective contrast of  
357 0.125 on the display background, and were then added to the Kanisza figure. Finally, a  
358 circular aperture was applied to the noise to ensure the edges of the inducers were equally  
359 spaced from the noise edge (**Fig. 1b**).

360

361 The jaw size of inducers was manipulated such that they were wider or narrower than an  
362 equilateral triangle, which would have exactly  $60^\circ$  of jaw angle for all inducers. The  
363 observer's task was to indicate whether the jaws of the attended inducers was consistent  
364 with a triangle that was narrower or wider than an equilateral triangle. Prior to the first trial  
365 of a block, a message on the screen indicated which set of inducers framed the "target"  
366 triangle, and this was held constant within a block but alternated across blocks. The polarity  
367 of the target inducers and whether the triangles were narrow or wide was pseudorandomly  
368 assigned across trials such that an equal number of all trial types were included in each  
369 block. The relative jaw size of attended inducers was independent of the unattended  
370 inducers; thus, the identity of the non-target triangle was uncorrelated with the correct  
371 response.

372

373 Each trial began with the onset of the fixation spot and a check of fixation compliance for  
374 250 ms. Following an additional random interval (0-500 ms uniformly distributed), the  
375 stimulus was presented for 250 ms, after which only the background was presented while  
376 observers were given unlimited duration to report the jaw size using a button press. The  
377 next trial would immediately follow a response. Throughout the experiment, eye tracking  
378 was used to ensure observers did not break fixation during stimulus presentation. If gaze  
379 position strayed from fixation by more than  $2^\circ$  the trial was aborted and a message was  
380 presented instructing them to maintain fixation during stimulus presentation, and then the  
381 trial was repeated. Such breaks in fixation were extremely rare for all participants.

382

383 A three-down one-up staircase procedure was used to progress the difficulty of the task by  
384 varying the difference of the jaw size from  $60^\circ$  (i.e., from what would form an equilateral  
385 triangle). On each trial an additional angle was randomly added or subtracted to the standard  
386  $60^\circ$  inducers. The initial difference was  $2^\circ$ . Following three correct responses, this difference  
387 would decrease by a step size of  $0.5^\circ$ , or would increase by the same amount following a  
388 single error. When an incorrect response was followed by three correct responses (i.e., a  
389 reversal), the step size halved. If two incorrect responses were made in a row, the step size  
390 would double. If the step size fell below  $0.05^\circ$ , it would be reset to  $0.2^\circ$ . Blocks consisted of  
391 624 trials which took approximately 20 minutes including a forced break. Each observer  
392 completed 16 blocks for a total of 9984 trials, which took a total of approximately five hours  
393 duration spread over multiple days and testing sessions. To familiarize observers with the



394 task, they underwent two training blocks of 624 trials each with no noise. They then were  
395 shown the stimulus with noise, and completed as many trials as they felt was required before  
396 starting the experimental blocks.

397

398 **Support vector machine models.** Support vector machine (SVM) classifiers were trained  
399 and tested in MATLAB. We generated (3) hypotheses by training SVM classifiers on images  
400 of the *i)* inducers, *ii)* a triangle, or *iii)* a star. We trained the classifiers using a quadratic  
401 kernel function and a least squares method of hyperplane separation. The training images  
402 consisted of two exemplars (“narrow” and “wide”) with no noise. To generate hypotheses in  
403 the form of classification images, we used each of the classifiers to perform narrow/wide  
404 triangle judgements (trials = 9984), with an equilateral triangle; thus, classification was  
405 exclusively influenced by the noise in the image.

406

407 **Data and statistical analysis.** The 9984 noise images for a participant were separated  
408 according to perceptual report (“narrow” or “wide”). To collapse across inducer polarity, we  
409 reflected the distribution of noise on trials in which the cued inducers were white (i.e., we  
410 inverted the sign). We also collapsed across upright and inverted cue conditions by spatially  
411 flipping the noise on inverted trials. The noise values were then summed within each report  
412 type. The difference of these summed images is the raw classification image. To average  
413 across emergent triangle edges, we further summed the image with itself two times after  
414 rotating 120° and 240° using Matlab’s “imrotate” function using bilinear interpolation. This  
415 procedure results in a classification image that is invariant across edges such that analysis  
416 of one edge summarises all three edges. Note that this is a conservative estimate of the  
417 classification image and any spurious structure will only be diminished. To test for correlated  
418 pixels along the illusory edge of the classification image, we extracted 18 pixels along the  
419 bottom edge of the implied triangle, but within the bounds of the implied star tip (see bottom  
420 right panel of **Fig. 2a**). To ensure that these pixels were not contaminated by averaging of  
421 nearest-neighbour pixels during rotation, described above, we excluded the three pixels  
422 closest to the inner corners of the star. We conducted a one-sample, two-tailed Bayesian  
423 and Students’ T-Test on these pixel values using JASP software (JASP Team, 2017).  
424 Reported effect sizes are Cohen’s *d*.

425



426 We performed the model comparisons in **Figure 2c** by first normalising the noise of the  
427 mean classification image and each SVM prediction such that the sum of squared error of  
428 each image equalled 1. We then subtracted the mean classification image from each  
429 prediction, and found the sum of squared error of the resulting difference. Finally, we  
430 normalised the difference scores to the model with the least error by subtracting from each  
431 distribution the mean of the distribution with the lowest error. This process was repeated for  
432 200 repetitions of each SVM prediction. The mixture modelling (**Fig. 3c**) was performed  
433 similarly, but we further used Monte Carlo simulations to estimate the proportion of trials in  
434 which a triangle was perceived. In this case, each set of 200 simulated experiments included  
435 a proportion of triangle template trials, ranging from 0.33 (chance) to 1. We validated this  
436 model fitting procedure by generating a simulated classification image with a known  
437 generative template, or with proportional mixtures of templates, and then verified the model  
438 fitting returned results that approximated the ground truth. The Monte Carlo simulations were  
439 highly accurate for a range of simulated proportions, but slightly overestimated the  
440 contribution of the triangle template when the ground truth contribution was close to 0.33,  
441 and, conversely, slightly underestimated its contribution when the triangle was the only  
442 contributor.

443

444 **Data availability.** The data that support the findings of this study are available from the  
445 corresponding author upon request.

446

#### 447 **ACKNOWLEDGEMENTS**

448 We are indebted to Peter Bex who developed the novel Kanizsa figure with us and  
449 provided helpful feedback on our study design and results. We also thank Tom Wallis for  
450 feedback on an earlier draft which led to the mixture modelling and overall improvements  
451 in the manuscript. This research was supported by funding to W.J.H. from King's College  
452 Cambridge and the National Health and Medical Research Council of Australia  
453 (APP1091257).

454

#### 455 **AUTHOR CONTRIBUTIONS**

456 Both authors designed the experiment and collected the data. WJH analysed the  
457 experimental data, RR performed the SVM analyses, and both authors performed the  
458 model comparisons. Both authors contributed equally to the writing of the manuscript.

459

460 We declare we have no competing interests.

461

## 462 REFERENCES

- 463 1. Kanizsa G (1976) Subjective contours. *Sci Am* 234(4):48–52.
- 464 2. Zhou H, Friedman HS, von der Heydt R (2000) Coding of border ownership in  
465 monkey visual cortex. *J Neurosci* 20(17):6594–6611.
- 466 3. Qiu FT, Sugihara T, von der Heydt R (2007) Figure-ground mechanisms provide  
467 structure for selective attention. *Nat Neurosci* 10(11):1492–1499.
- 468 4. von der Heydt R, Macuda T, Qiu FT (2005) Border-ownership-dependent tilt  
469 aftereffect. *J Opt Soc Am A Opt Image Sci Vis* 22(10):2222–2229.
- 470 5. von der Heydt R, Peterhans E, Baumgartner G (1984) Illusory contours and cortical  
471 neuron responses. *Science* 224(4654):1260–1262.
- 472 6. Mihalas S, Dong Y, von der Heydt R, Niebur E (2011) Mechanisms of perceptual  
473 organization provide auto-zoom and auto-localization for attention to objects. *Proc*  
474 *Natl Acad Sci U S A* 108(18):7583–7588.
- 475 7. Necker LA (1832) LXI. Observations on some remarkable optical phænomena seen in  
476 Switzerland; and on an optical phænomenon which occurs on viewing a figure of a  
477 crystal or geometrical solid. *Lond Edinb Dublin Philos Mag J Sci* 1(5):329–337.
- 478 8. Driver J, Baylis GC (1996) Edge-assignment and figure-ground segmentation in short-  
479 term visual matching. *Cognit Psychol* 31(3):248–306.
- 480 9. Rubin E (1915) *Synsoplevede Figurer. Studier i psykologisk Analyse /Visuell*  
481 *wahrgenommene Figuren. Studien in psychologischer Analyse [Visually perceived*  
482 *figures: Studies in psychological analysis]* (Gyldendalske Boghandel, Copenhagen,  
483 Denmark).
- 484 10. Wagemans J, et al. (2012) A century of Gestalt psychology in visual perception: I.  
485 Perceptual grouping and figure-ground organization. *Psychol Bull* 138(6):1172–1217.
- 486 11. Tse PU (2005) Voluntary attention modulates the brightness of overlapping  
487 transparent surfaces. *Vision Res* 45(9):1095–1098.
- 488 12. Wannig A, Stanisor L, Roelfsema PR (2011) Automatic spread of attentional response  
489 modulation along Gestalt criteria in primary visual cortex. *Nat Neurosci* 14(10):1243–  
490 1244.
- 491 13. Houtkamp R, Spekrijse H, Roelfsema PR (2003) A gradual spread of attention  
492 during mental curve tracing. *Percept Psychophys* 65(7):1136–1144.
- 493 14. McMains S, Kastner S (2011) Interactions of Top-Down and Bottom-Up Mechanisms  
494 in Human Visual Cortex. *J Neurosci* 31(2):587–597.
- 495 15. Gold JM, Murray RF, Bennett PJ, Sekuler AB (2000) Deriving behavioural receptive  
496 fields for visually completed contours. *Curr Biol* 10(11):663–666.
- 497 16. van Lier R, Vergeer M, Anstis S (2009) Filling-in afterimage colors between the lines.  
498 *Curr Biol* 19(8):R323–4.
- 499 17. Poort J, et al. (2012) The role of attention in figure-ground segregation in areas V1  
500 and V4 of the visual cortex. *Neuron* 75(1):143–156.
- 501 18. Harrison WJ, Ayeni AJ, Bex PJ (2017) Selective attention modulates surface filling-in.  
502 *bioRxiv*. doi:10.1101/221150.

- 503 19. Murray MM, et al. (2002) The spatiotemporal dynamics of illusory contour processing:  
504 combined high-density electrical mapping, source analysis, and functional magnetic  
505 resonance imaging. *J Neurosci* 22(12):5055–5073.
- 506 20. Stanley DA, Rubin N (2003) fMRI activation in response to illusory contours and  
507 salient regions in the human lateral occipital complex. *Neuron* 37(2):323–331.
- 508 21. Davis G, Driver J (1994) Parallel detection of Kanizsa subjective figures in the human  
509 visual system. *Nature* 371(6500):791–793.
- 510 22. Mattingley JB, Davis G, Driver J (1997) Preattentive filling-in of visual surfaces in  
511 parietal extinction. *Science* 275(5300):671–674.
- 512 23. Brainard DH (1997) The Psychophysics Toolbox. *Spat Vis* 10(4):433–436.
- 513 24. Cornelissen FW, Peters EM, Palmer J (2002) The Eyelink Toolbox: eye tracking with  
514 MATLAB and the Psychophysics Toolbox. *Behav Res Methods Instrum Comput*  
515 34(4):613–617.
- 516 25. Pelli DG (1997) The VideoToolbox software for visual psychophysics: Transforming  
517 numbers into movies. *Spat Vis* 10(4):437–442.
- 518
- 519

520 **SUPPLEMENTARY FIGURES**

521

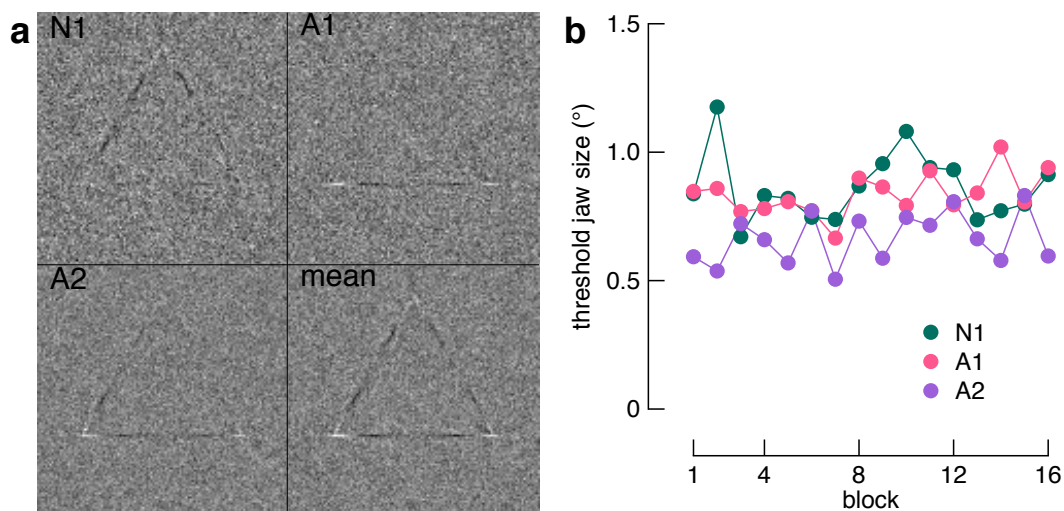

522

523 **Supplementary Figure 1.** Raw classification images and psychophysical performance. a)

524 Classification images without averaging of edges via rotation. b) Threshold performance

525 across blocks shown separately for each observer. Thresholds were the midpoint of a

526 cumulative Gaussian fit to accuracy data for each session.

527

528

529

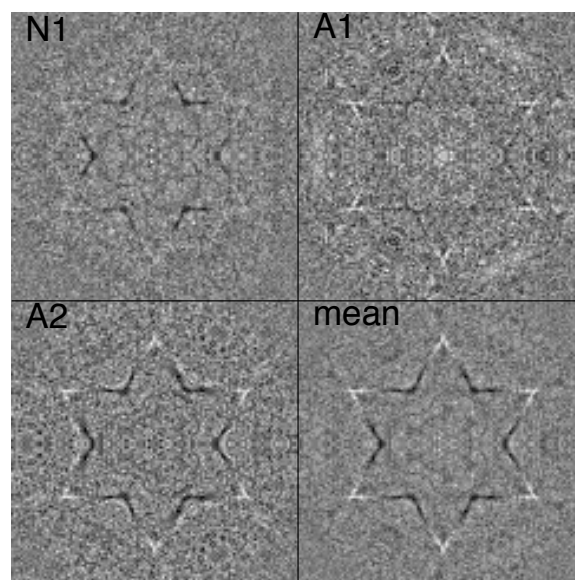

530

531 **Supplementary Figure 2.** Individual classification images revealing a potential influence

532 of non-cued structure. These images were created by summing each classification image

533 with a flipped version of itself. Note that the emergent structure aligns to the geometry of

534 the star implied by our Kanizsa figure (**Fig. 1a**).
